# Supplementary material for: Influence of dopants Cu, Ga, In, Hg on the electronic structure of CdnSn (n = 6, 15) clusters – a DFT study
Source: Royal Society of Chemistry journal article supplement (doi:10.1039/c6ra15049g), 2016-01-01
Supplement: c6ra15049g1.pdf [file c6ra15049g1.pdf]

Supporting Information:

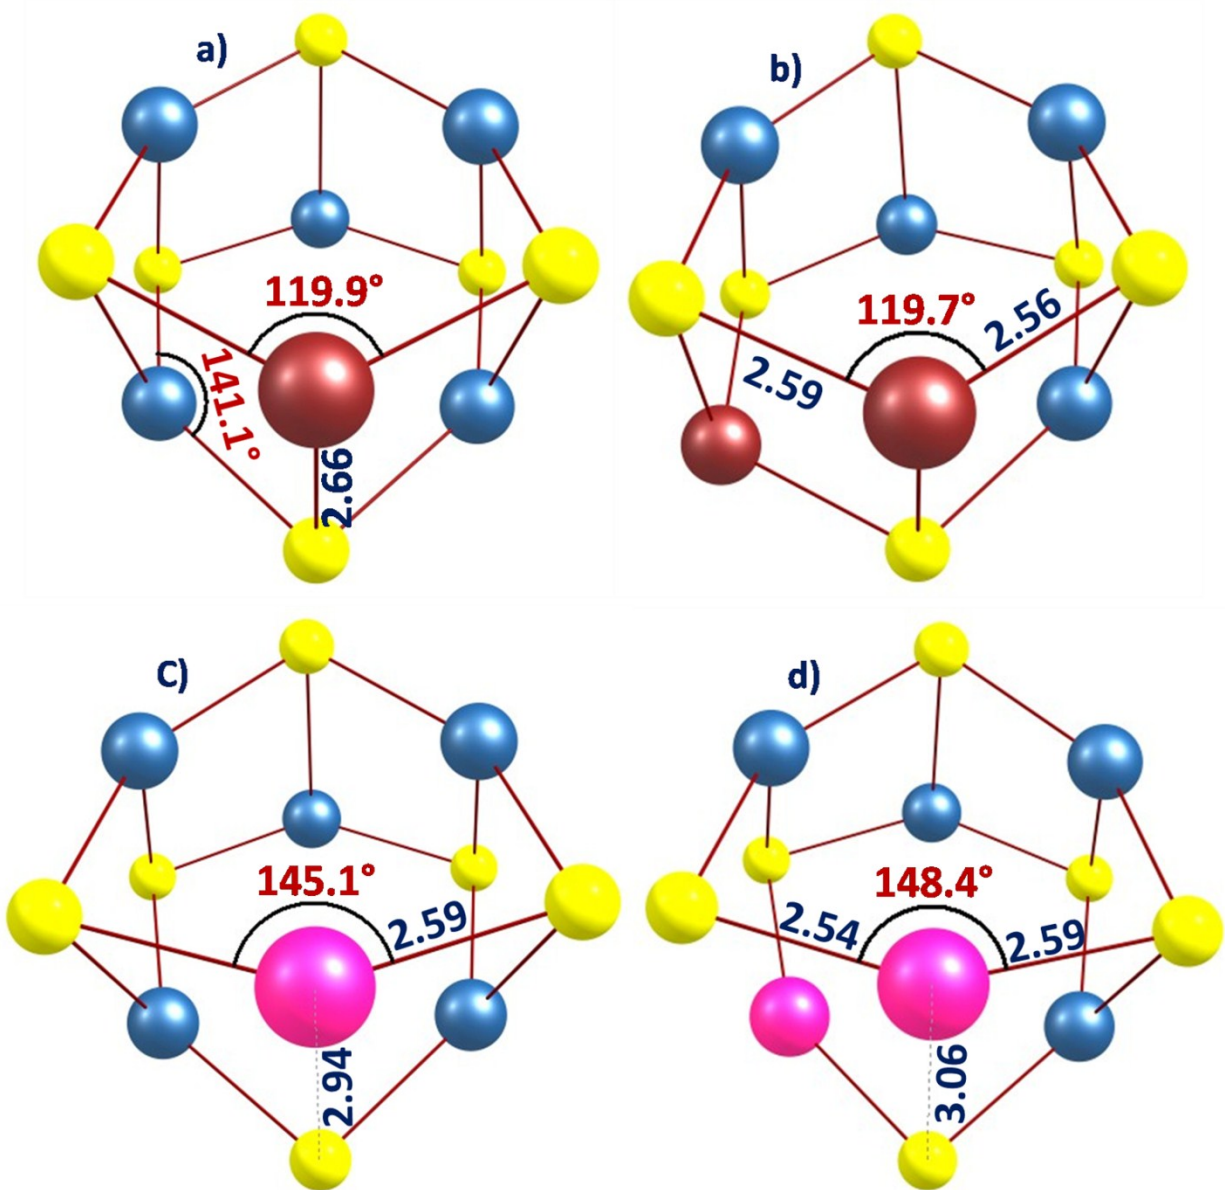

**Figure S1.** The optimized structures of doped  $\text{Cd}_{6-y}\text{X}_y\text{S}_6$  ( $\text{X} = \text{In}^{2+}$ ,  $\text{Hg}^{2+}$ ;  $y = 1, 2$ ) clusters. The significant distorted bond lengths (in Å) are denoted in navy and bond angles (in °) are in dark red. Cd atoms are in blue, S in dark yellow, In in brown, and Hg in dark pink.

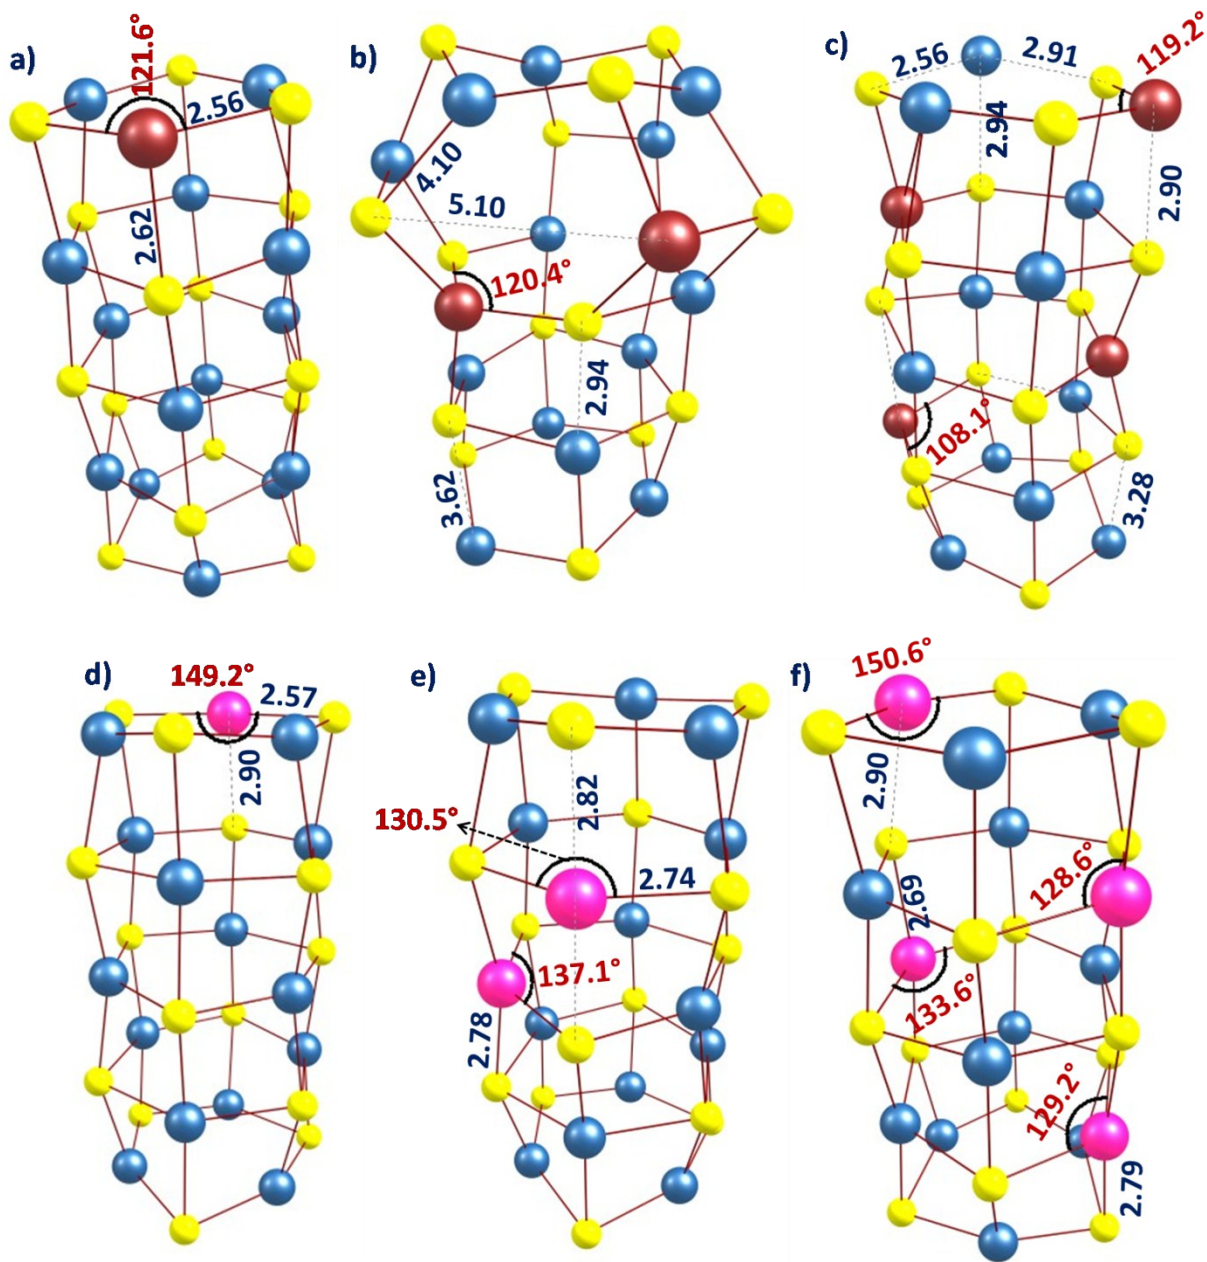

**Figure S2.** The optimized structures of doped  $\text{Cd}_{15-y}\text{X}_y\text{S}_{15}$  ( $\text{X} = \text{In}^{2+}, \text{Hg}^{2+}; y = 1, 2, 4$ ) clusters. The significant distorted bond lengths (in Å) are denoted in navy and bond angles (in °) are in dark red. Cd atoms are in blue, S in dark yellow, In in brown, and Hg in pink.

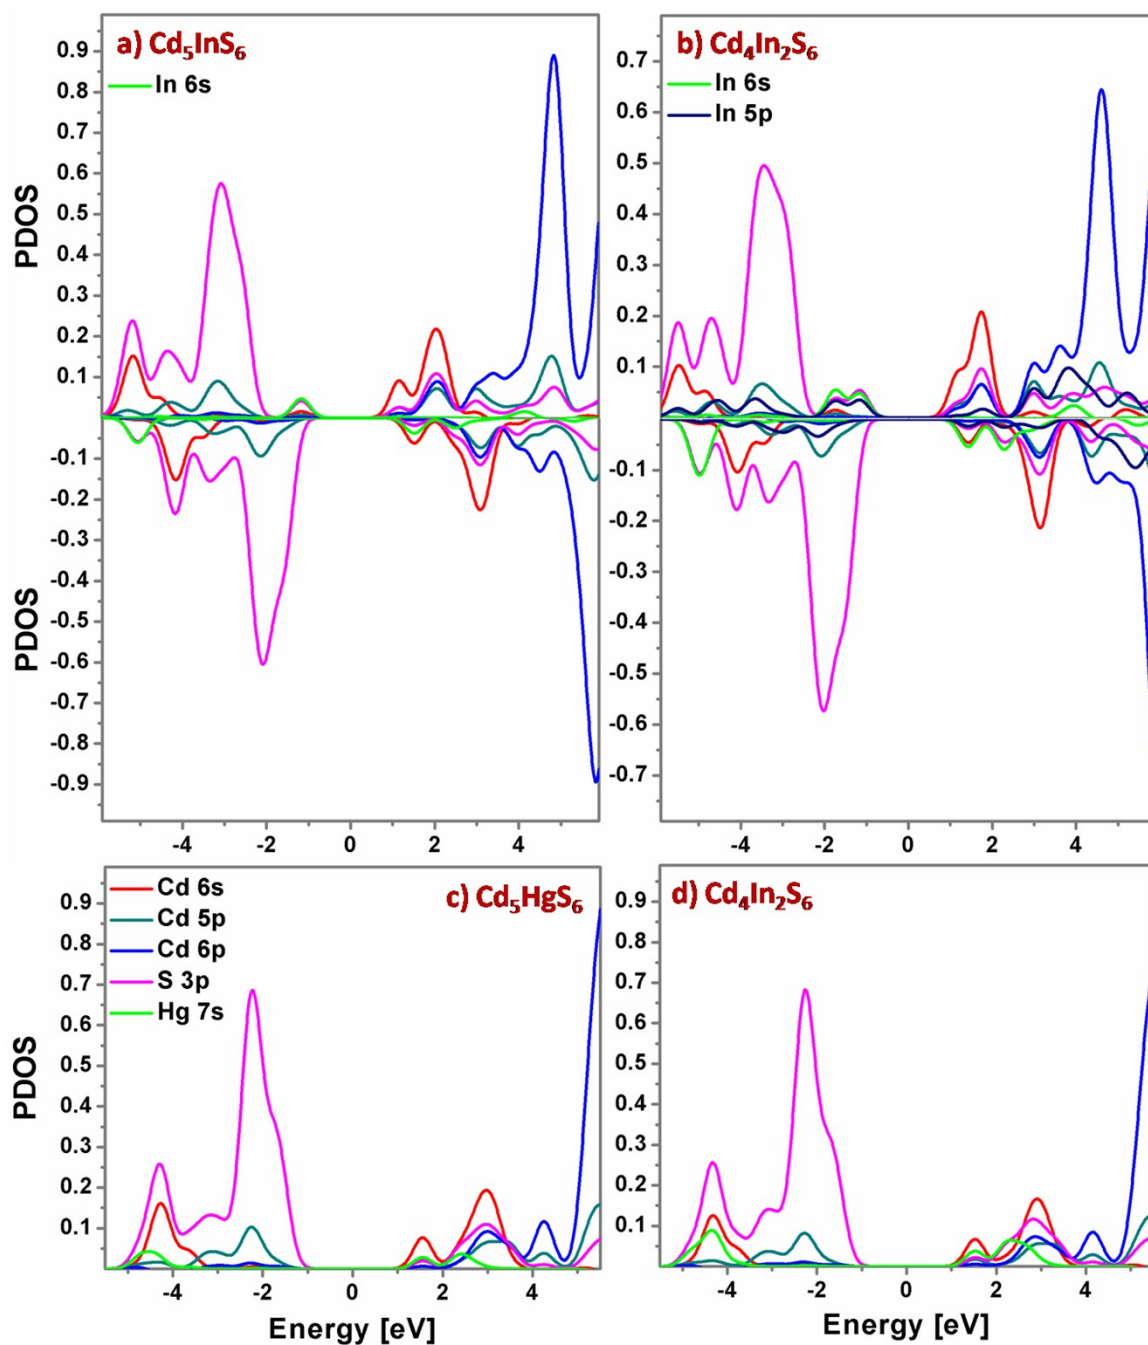

**Figure S3.** The calculated Total (TDOS) and partial (PDOS) density of states for the doped  $\text{Cd}_6\text{-}_y\text{X}_y\text{S}_6$  ( $\text{X} = \text{In}, \text{Hg}$  and  $y = 1, 2$ ) clusters. The positive and negative amplitudes represent the spin up and spin down states of the doped clusters respectively. The midgap is set to zero.

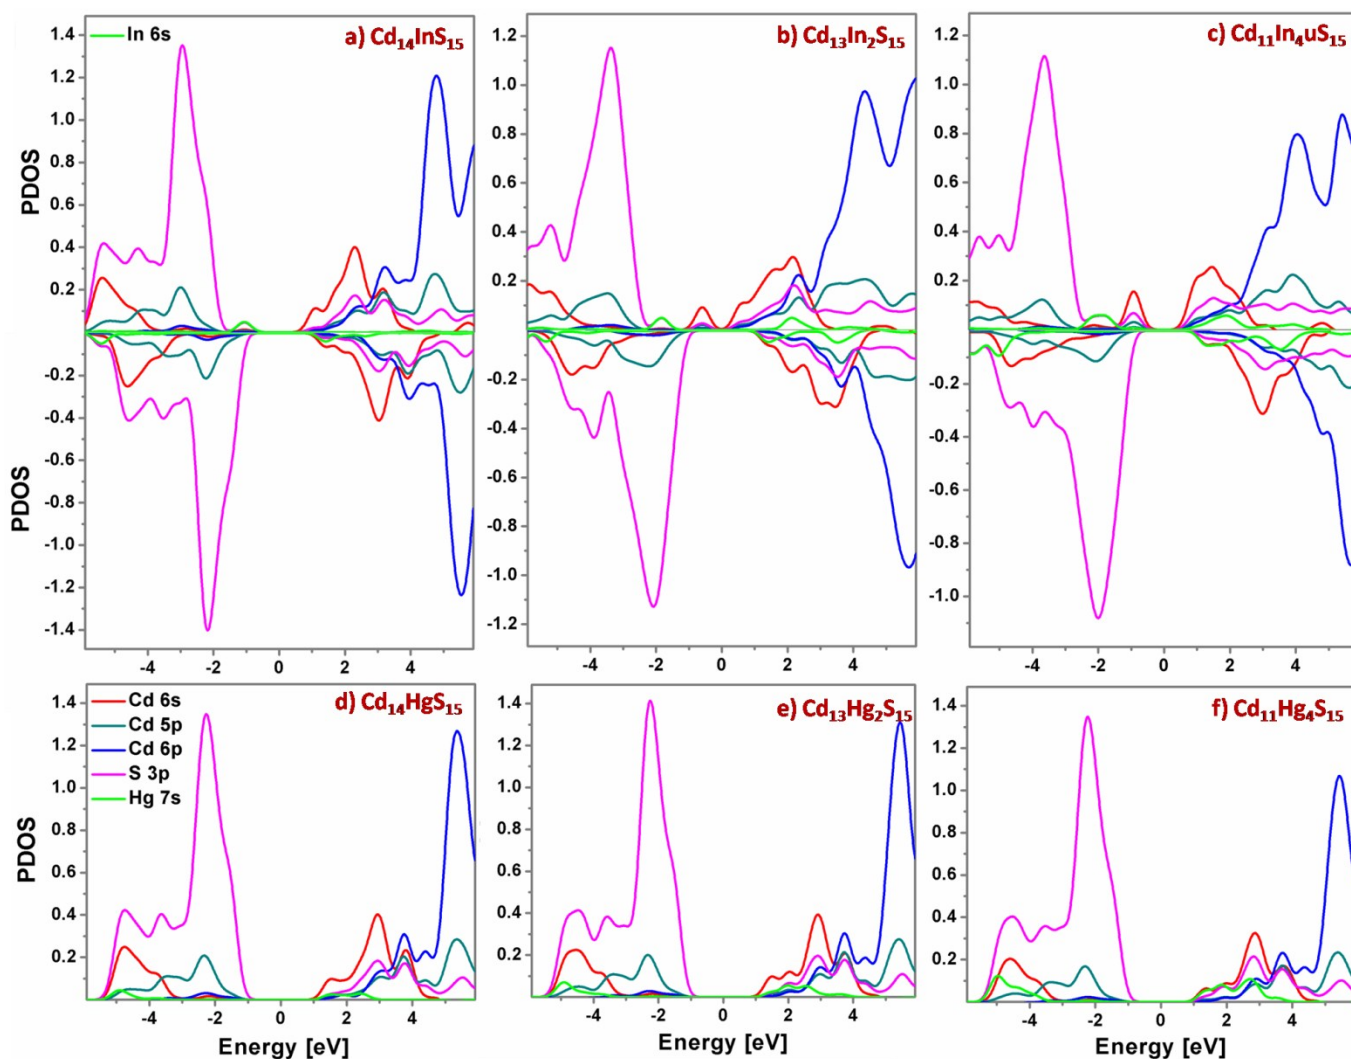



**Figure S4.** The calculated Total (TDOS) and partial (PDOS) density of states for the doped  $\text{Cd}_{15-y}\text{X}_y\text{S}_{15}$  ( $\text{X} = \text{In}, \text{Hg}$  and  $y = 1, 2$  and  $4$ ) clusters. The positive and negative amplitudes represent the spin up and spin down states of the doped clusters respectively. The midgap is set to zero.

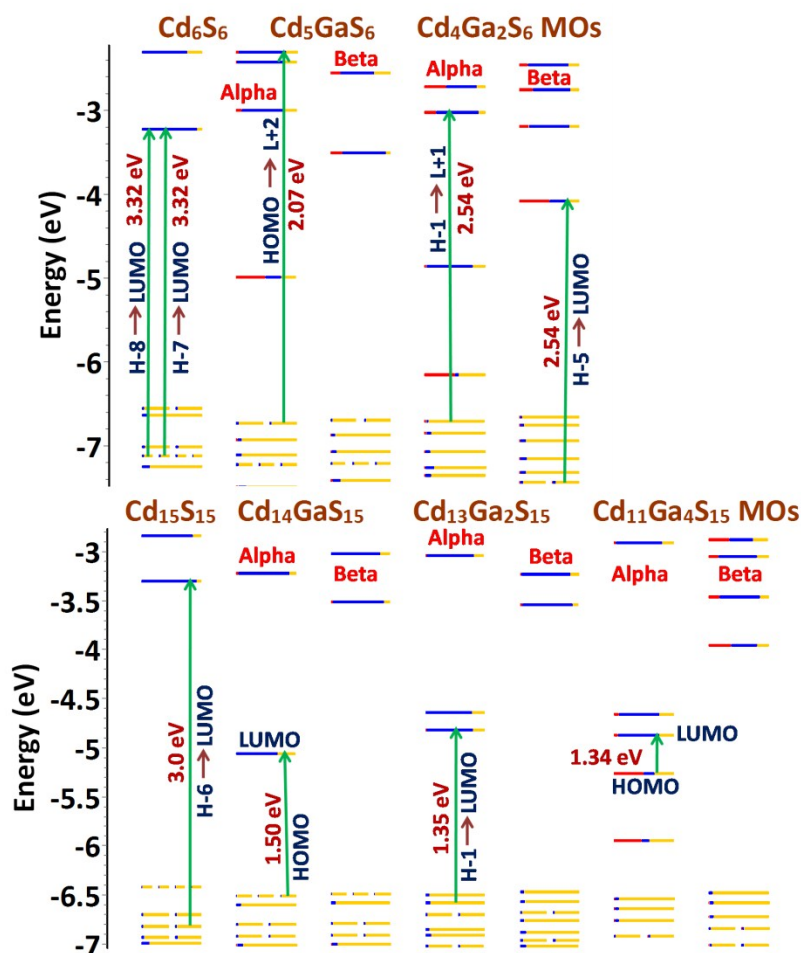

**Figure S5.** The energy levels of MOs near HOMO and LUMO of both  $\text{Cd}_6\text{S}_6$  and  $\text{Cd}_{15}\text{S}_{15}$  clusters doped with  $\text{Ga}^{2+}$  along with their composition due to the AOs are indicated by dark blue for  $\text{Cd}^{2+}$ , yellow for  $\text{S}^{2-}$  and red for  $\text{Ga}^{2+}$  ions. The green arrows represent the singlet transitions calculated using TD-DFT.

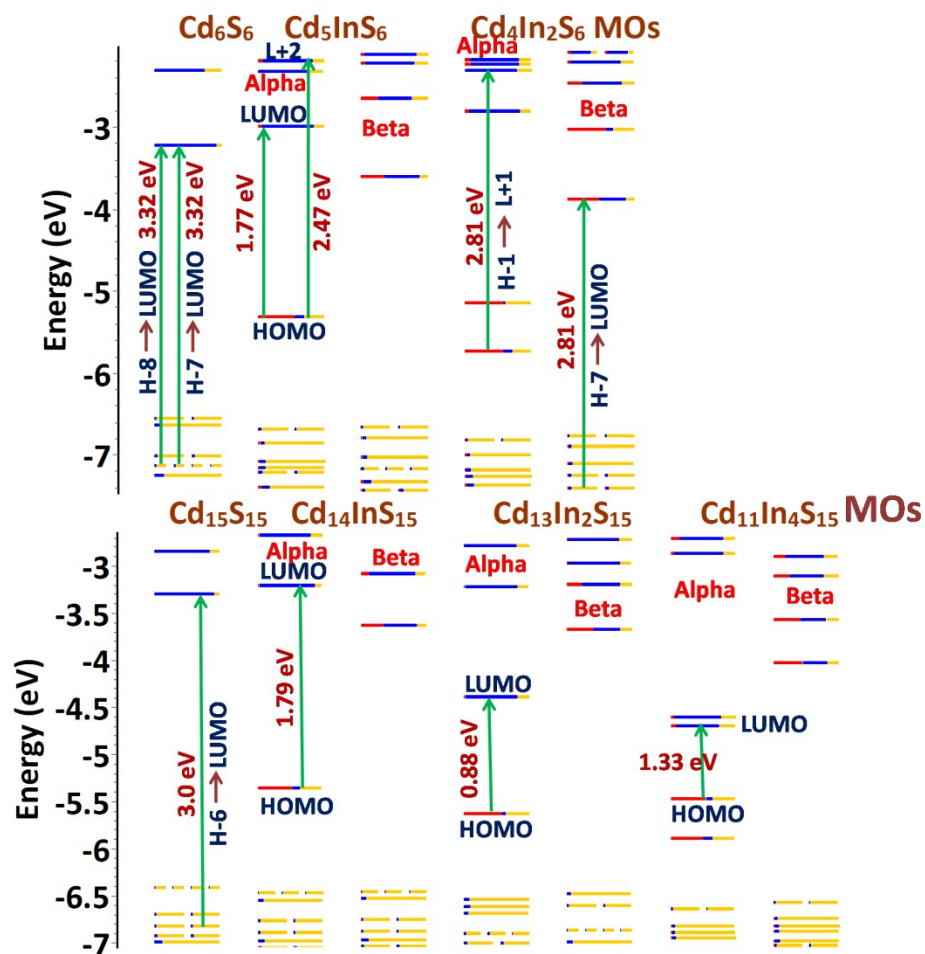

**Figure S6.** The energy levels of MOs near HOMO and LUMO of both Cd<sub>6</sub>S<sub>6</sub> and Cd<sub>15</sub>Se<sub>15</sub> clusters doped with In<sup>2+</sup> along with their composition due to the AOs are indicated by dark blue for Cd<sup>2+</sup>, yellow for S<sup>2-</sup> and red for In<sup>2+</sup> ions. The green arrows represent the singlet transitions calculated using TD-DFT.

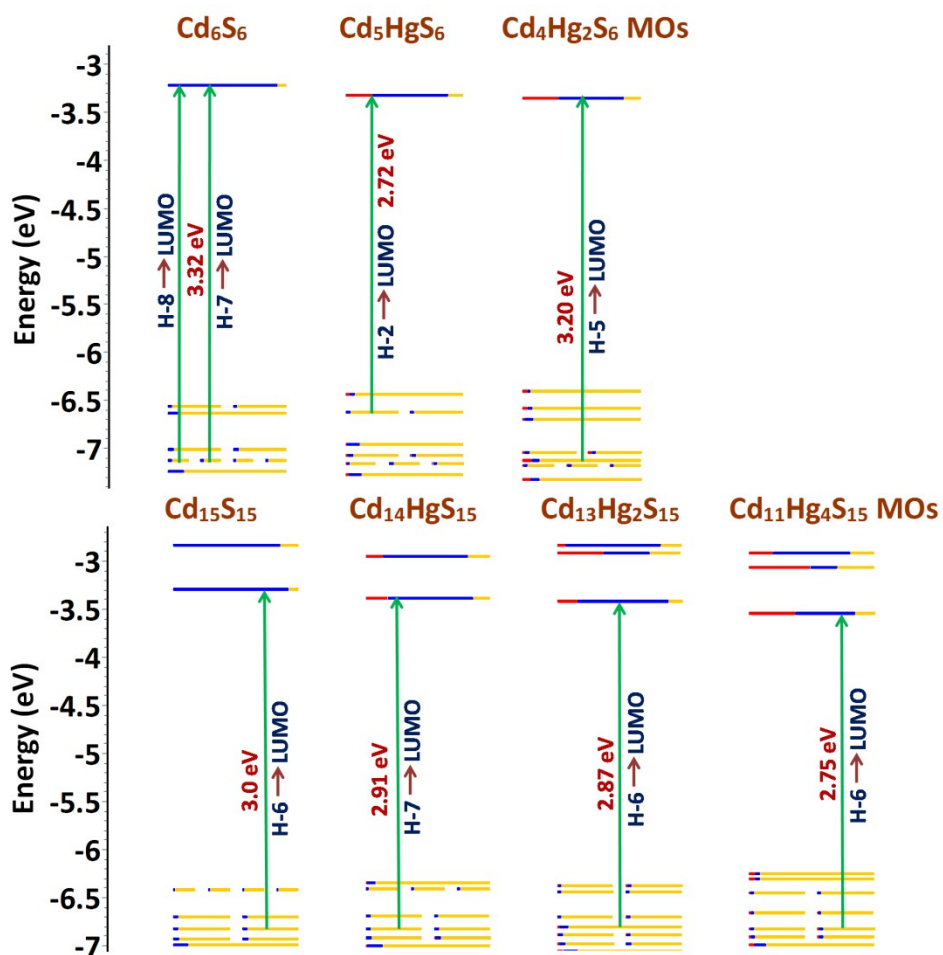

**Figure S7.** The energy levels of MOs near HOMO and LUMO of both Cd<sub>6</sub>S<sub>6</sub> and Cd<sub>15</sub>Se<sub>15</sub> clusters doped with Hg<sup>2+</sup> along with their composition due to the AOs are indicated by dark blue for

$\text{Cd}^{2+}$ , yellow for  $\text{S}^{2-}$  and red for  $\text{Hg}^{2+}$  ions. The green arrows represent the singlet transitions calculated using TD-DFT.

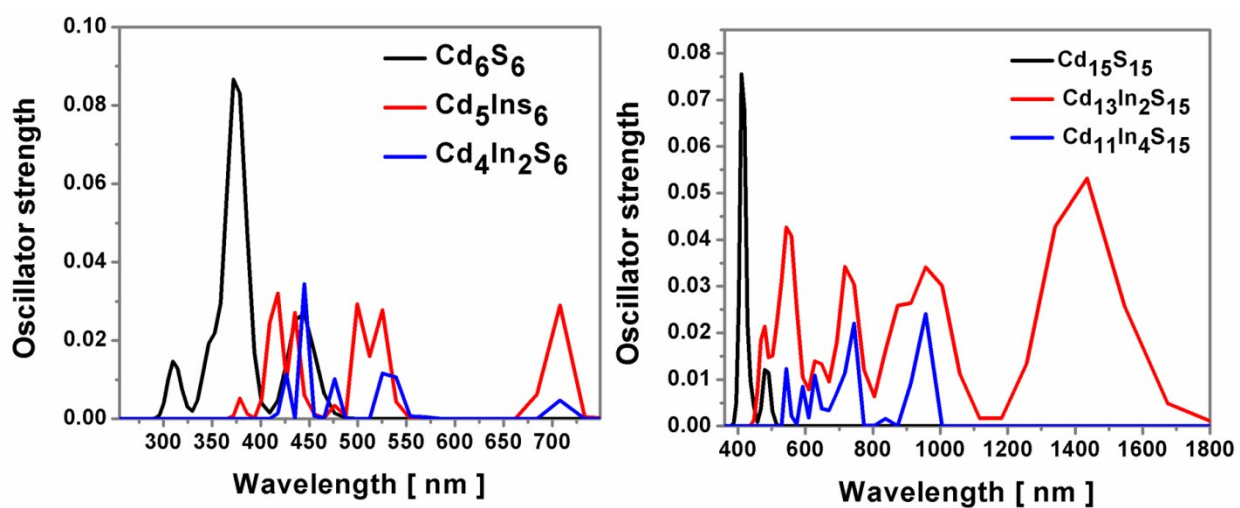

**Figure S8.** The absorption spectra of  $\text{Cd}_{6-y}\text{In}_y\text{S}_6$  clusters where  $y = 1, 2$  are compared with pure  $\text{Cd}_6\text{S}_6$  cluster calculated using TD-DFT.



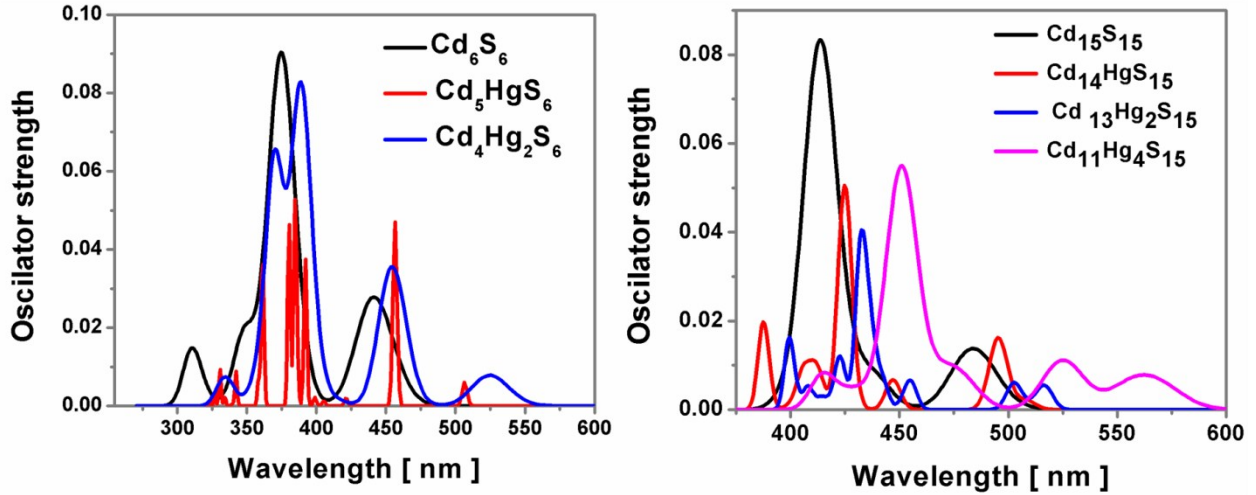

**Figure S9.** The absorption spectra of  $\text{Cd}_6\text{S}_6$  and  $\text{Cd}_{6-y}\text{Hg}_y\text{S}_6$  clusters where  $y = 1, 2$  were calculated using TD-DFT when the impurity is located at the surface.

**Table S1.** Dopant's binding energy ( $E_b$ ), HOMO-LUMO gap ( $E_g$ ), Natural atomic charge ( $q_x$ ) and spin density ( $\rho_x$ ) of dopants for the pristine  $\text{Cd}_{15}\text{S}_{15}$  and doped  $\text{Cd}_{15-y}\text{X}_y\text{S}_{15}$  ( $y=1, 2, 4$ ) clusters. The spin multiplicity ( $2S+1$ ) is given in parentheses.

| system                            | $E_b$ [eV] | $E_g$ [eV] | $q_x$ [a.u.]          | $\rho(x)$                 |
|-----------------------------------|------------|------------|-----------------------|---------------------------|
| $\text{Cd}_{15}\text{S}_{15}$ (1) | -          | 3.11       | -                     | -                         |
| Cu (2)                            | 0.85       | 1.55       | 0.46                  | 0.08                      |
| $\text{Cu}_2$ (3)                 | 1.67       | 1.81       | [0.46/0.50]*          | 0.17[0.08/0.09]           |
| $\text{Cu}_4$ (5)                 | 2.74       | 0.76       | [0.39/0.39/0.43/0.33] | 0.48[0.19/0.06/0.07/0.16] |
| Ga (2)                            | 1.43       | 1.55       | 1.0                   | 0.19                      |
| $\text{Ga}_2$ (3)                 | 2.56       | 1.09       | [1.23/1.24]           | 1.23[0.61/0.62]*          |
| $\text{Ga}_4$ (5)                 | 5.37       | 0.70       | [1.0/1.71/1.19/0.95]  | 1.47[0.16/0.59/0.59/0.13] |
| In (2)                            | 1.32       | 1.73       | 1.15                  | 0.24                      |
| $\text{In}_2$ (3)                 | 2.76       | 0.71       | [1.12/1.46]           | 0.93[0.21/0.72]           |
| $\text{In}_4$ (5)                 | 4.38       | 0.58       | [1.14/1.44/1.47/1.13] | 1.88[0.23/0.71/0.72/0.22] |
| Hg (1)                            | -1.28      | 2.96       | 1.01                  | 0                         |
| $\text{Hg}_2$ (1)                 | -2.95      | 2.95       | [1.02/1.04]           | 0                         |
| $\text{Hg}_4$ (1)                 | -5.69      | 2.70       | [1.01/1.02/1.05/1.02] | 0                         |

\*the natural atomic charge and spin density at individual dopants.

**Table S2.** The calculated absorption energy (E in eV and  $\lambda$  in nm) and oscillator strength (f in a.u.) of bare Cd<sub>15</sub>Se<sub>15</sub> cluster doped by a variety of dopants at TD-B3LYP/Lanl2dz/6-31+G\* level of theory.

| system                                           | Absorption energy (E) [eV] | Absorption wavelength ( $\lambda$ ) [nm] | Orbital transitions           | Oscillator strength f(a.u.) |
|--------------------------------------------------|----------------------------|------------------------------------------|-------------------------------|-----------------------------|
| Cd <sub>15</sub> S <sub>15</sub>                 | 3.00                       | 412.88                                   | H-6 ->LUMO(0.67) <sup>s</sup> | 0.083                       |
| Cd <sub>14</sub> CuS <sub>15</sub>               | 1.83                       | 676.035                                  | H-8 (b)* ->LUMO(b)(0.87)      | 0.048                       |
| Cd <sub>14</sub> CuS <sub>15</sub>               | 2.27                       | 545.876                                  | H-14 (b) ->LUMO(b)(0.68)      | 0.023                       |
| Cd <sub>14</sub> CuS <sub>15</sub>               | 1.83                       | 676.663                                  | H-18 (b) ->LUMO(b)(0.45)      | 0.011                       |
| Cd <sub>13</sub> Cu <sub>2</sub> S <sub>15</sub> | 1.59                       | 778.311                                  | H-8 (b) ->LUMO(b)(0.52)       | 0.045                       |
|                                                  |                            |                                          | H-9 (b) ->LUMO(b)(0.47)       | 0.045                       |
| Cd <sub>13</sub> Cu <sub>2</sub> S <sub>15</sub> | 1.50                       | 825.740                                  | H-1 (b) ->L+1(b) (0.57)       | 0.021                       |
| Cd <sub>11</sub> Cu <sub>4</sub> S <sub>15</sub> | 1.07                       | 1164.724                                 | H-7 (b) ->LUMO(b)(0.38)       | 0.008                       |
| Cd <sub>14</sub> GaS <sub>15</sub>               | 1.76                       | 705.181                                  | HOMO (a) ->L+1(a) (0.96)      | 0.041                       |
| Cd <sub>14</sub> GaS <sub>15</sub>               | 1.50                       | 828.665                                  | HOMO (a) ->LUMO (a) (0.97)    | 0.044                       |
| Cd <sub>13</sub> Ga <sub>2</sub> S <sub>15</sub> | 1.48                       | 839.210                                  | H-1 (a)* ->LUMO(a) (0.96)     | 0.028                       |
| Cd <sub>13</sub> Ga <sub>2</sub> S <sub>15</sub> | 1.35                       | 916.777                                  | H-1 (a) ->LUMO(a) (0.87)      | 0.069                       |
| Cd <sub>11</sub> Ga <sub>4</sub> S <sub>15</sub> | 1.34                       | 926.713                                  | HOMO (a) ->LUMO(a) (0.80)     | 0.044                       |
| Cd <sub>14</sub> InS <sub>15</sub>               | 1.79                       | 692.885                                  | HOMO (a) ->LUMO(a) (0.97)     | 0.039                       |

|                                                  |      |          |                              |       |
|--------------------------------------------------|------|----------|------------------------------|-------|
| Cd <sub>13</sub> In <sub>2</sub> S <sub>15</sub> | 1.70 | 730.741  | H-1 (a) ->LUMO(a) (0.72)     | 0.080 |
| Cd <sub>13</sub> In <sub>2</sub> S <sub>15</sub> | 0.88 | 1405.565 | HOMO (a) ->LUMO(a)<br>(1.00) | 0.055 |
| Cd <sub>11</sub> In <sub>4</sub> S <sub>15</sub> | 1.33 | 930.538  | HOMO (a) ->LUMO(a)<br>(0.69) | 0.034 |
| Cd <sub>14</sub> HgS <sub>15</sub>               | 2.91 | 426.071  | H-6 (a) ->LUMO(a) (0.55)     | 0.071 |
| Cd <sub>14</sub> HgS <sub>15</sub>               | 2.92 | 424.112  | H-6 (a) ->LUMO(a) (0.60)     | 0.047 |
| Cd <sub>14</sub> HgS <sub>15</sub>               | 2.91 | 425.553  | H-7 (a) ->LUMO(a) (0.59)     | 0.063 |
| Cd <sub>13</sub> Hg <sub>2</sub> S <sub>15</sub> | 2.85 | 435.187  | H-6 (a) ->LUMO(a) (0.60)     | 0.039 |
| Cd <sub>13</sub> Hg <sub>2</sub> S <sub>15</sub> | 2.87 | 431.582  | H-6 (a) ->LUMO(a) (0.49)     | 0.035 |
| Cd <sub>11</sub> Hg <sub>4</sub> S <sub>15</sub> | 2.75 | 450.183  | H-6 (a) ->LUMO(a) (0.62)     | 0.052 |

\*a,b refers to alpha and beta MOs,

<sup>s</sup>Values given with in parenthesis are the orbital coefficient.

For information only the transitions with oscillator strength higher than 0.008 a.u. are given.

## Cartesian coordinates for the optimized structures in standard orientation:

### For bare Cd<sub>6</sub>S<sub>6</sub> and doped Cd<sub>6</sub>XS<sub>6</sub> clusters:

#### 1. Bare Cd<sub>6</sub>S<sub>6</sub> cluster:

\*\*\*\*\*

```

48    2.234010  -0.186590  -1.220035
16    1.572997   2.265675  -1.449828
48   -0.955935   2.027046  -1.219165
16   -2.750692   0.229914  -1.449138
48   -1.279345  -1.840601  -1.219051
16    1.175177  -2.494975  -1.449963
48    0.955932  -2.027031   1.219165
16   -1.572998  -2.265677   1.449834
48   -2.234002   0.186591   1.220027

```

|    |           |           |          |
|----|-----------|-----------|----------|
| 16 | -1.175179 | 2.494979  | 1.449966 |
| 48 | 1.279337  | 1.840584  | 1.219056 |
| 16 | 2.750702  | -0.229914 | 1.449138 |

\*\*\*\*\*

## 2. Cd<sub>5</sub>CuS<sub>6</sub> cluster:

\*\*\*\*\*

|    |           |           |           |
|----|-----------|-----------|-----------|
| 29 | -0.000010 | 1.842851  | 1.461808  |
| 16 | 2.238198  | 1.348957  | 1.690853  |
| 48 | 1.900900  | -1.123574 | 1.141913  |
| 16 | 0.000016  | -2.820435 | 1.101090  |
| 48 | -1.900883 | -1.123593 | 1.141916  |
| 16 | -2.238213 | 1.348935  | 1.690855  |
| 48 | -1.995283 | 1.391276  | -0.954344 |
| 16 | -2.397271 | -1.037756 | -1.560867 |
| 48 | 0.000010  | -1.910786 | -1.458167 |
| 16 | 2.397281  | -1.037729 | -1.560870 |
| 48 | 1.995265  | 1.391297  | -0.954344 |
| 16 | -0.000018 | 2.983999  | -0.761512 |

\*\*\*\*\*

## 3. Cd<sub>4</sub>Cu<sub>2</sub>S<sub>6</sub> cluster:

\*\*\*\*\*

|    |           |           |          |
|----|-----------|-----------|----------|
| 29 | -0.764685 | 1.870095  | 1.270018 |
| 16 | 1.409302  | 2.582815  | 1.012279 |
| 48 | 2.388042  | 0.235180  | 0.903293 |
| 16 | 1.583129  | -2.148280 | 1.226123 |

|    |           |           |           |
|----|-----------|-----------|-----------|
| 48 | -0.915045 | -1.640406 | 1.373244  |
| 16 | -2.413196 | 0.391595  | 1.785618  |
| 48 | -2.388042 | 0.235181  | -0.903293 |
| 16 | -1.583129 | -2.148280 | -1.226123 |
| 48 | 0.915045  | -1.640406 | -1.373244 |
| 16 | 2.413196  | 0.391595  | -1.785618 |
| 29 | 0.764686  | 1.870095  | -1.270018 |
| 16 | -1.409301 | 2.582816  | -1.012279 |

\*\*\*\*\*

#### 4. Cd<sub>5</sub>GaS<sub>6</sub> cluster:

\*\*\*\*\*

|    |           |           |           |
|----|-----------|-----------|-----------|
| 31 | -2.479092 | 0.000884  | 1.411508  |
| 16 | -1.361983 | 2.085121  | 1.631967  |
| 48 | 1.161421  | 1.880082  | 1.199492  |
| 16 | 2.877116  | -0.001004 | 1.224342  |
| 48 | 1.160062  | -1.880849 | 1.199491  |
| 16 | -1.363464 | -2.084149 | 1.632018  |
| 48 | -1.309978 | -1.923707 | -1.056710 |
| 16 | 1.144005  | -2.377407 | -1.484872 |
| 48 | 2.083637  | -0.000725 | -1.368941 |
| 16 | 1.145718  | 2.376635  | -1.484881 |
| 48 | -1.308566 | 1.924548  | -1.056763 |
| 16 | -2.997878 | 0.001044  | -1.003078 |

\*\*\*\*\*

#### 5. Cd<sub>4</sub>Ga<sub>2</sub>S<sub>6</sub> cluster:



\*\*\*\*\*

|    |           |           |           |
|----|-----------|-----------|-----------|
| 31 | -0.967491 | 2.154682  | 2.077522  |
| 16 | 0.685030  | 2.703300  | 0.576452  |
| 48 | 3.020351  | 0.638916  | 0.524627  |
| 16 | 1.956235  | -1.786347 | 1.151898  |
| 48 | -0.526054 | -1.686383 | 1.601050  |
| 16 | -2.259199 | 0.270296  | 1.917291  |
| 48 | -2.477127 | -0.160798 | -0.786694 |
| 16 | -1.479279 | -2.487377 | -0.756710 |
| 48 | 0.937482  | -1.699389 | -1.252867 |
| 16 | 1.841139  | 0.549690  | -2.184350 |
| 31 | 0.116515  | 1.769311  | -1.452672 |
| 16 | -1.959116 | 1.870662  | -2.173581 |

\*\*\*\*\*

### 6. $\text{Cd}_5\text{HgS}_6$ cluster:

\*\*\*\*\*

|    |           |           |           |
|----|-----------|-----------|-----------|
| 80 | -2.188232 | -0.000884 | -0.885889 |
| 16 | -1.436909 | -2.469719 | -1.085306 |
| 48 | 1.065213  | -1.971883 | -1.305128 |
| 16 | 2.591555  | 0.000986  | -1.843288 |
| 48 | 1.063523  | 1.972565  | -1.305213 |
| 16 | -1.438964 | 2.468587  | -1.085430 |
| 48 | -0.711222 | 1.913914  | 1.509487  |
| 16 | 1.789299  | 2.388731  | 1.266371  |
| 48 | 2.595965  | 0.001039  | 0.878538  |

16 1.791295 -2.387322 1.266493  
48 -0.709558 -1.914296 1.509591  
16 -2.266884 -0.000857 2.048777

\*\*\*\*\*

**7. Cd<sub>4</sub>Hg<sub>2</sub>S<sub>6</sub> cluster:**

\*\*\*\*\*

80 -1.571724 1.371338 -1.132210  
16 -2.184794 -0.990203 -1.846466  
48 0.196344 -1.846850 -1.784767  
16 2.585626 -0.918628 -1.775586  
48 2.198090 1.427512 -0.842896  
16 0.274337 3.111633 -0.634746  
48 0.196260 1.846859 1.784766  
16 2.585584 0.918741 1.775586  
48 2.198152 -1.427417 0.842897  
16 0.274475 -3.111622 0.634744  
80 -1.571661 -1.371406 1.132208  
16 -2.184838 0.990104 1.846473

\*\*\*\*\*

**8. Cd<sub>5</sub>InS<sub>6</sub> cluster:**

\*\*\*\*\*

49 -2.672493 -0.004386 -1.094773  
16 -1.414584 -2.215287 -1.347602  
48 1.118309 -1.891753 -1.283583  
16 2.789870 0.004190 -1.583176

|    |           |           |           |
|----|-----------|-----------|-----------|
| 48 | 1.111412  | 1.893926  | -1.284322 |
| 16 | -1.422186 | 2.210825  | -1.348438 |
| 48 | -0.999855 | 1.905978  | 1.283635  |
| 16 | 1.494393  | 2.375529  | 1.370385  |
| 48 | 2.399616  | 0.004026  | 1.108141  |
| 16 | 1.502497  | -2.370533 | 1.371330  |
| 48 | -0.993038 | -1.907941 | 1.284305  |
| 16 | -2.674812 | -0.003999 | 1.565717  |

\*\*\*\*\*

**9. Cd<sub>4</sub>In<sub>2</sub>S<sub>6</sub> cluster:**

\*\*\*\*\*

|    |           |           |           |
|----|-----------|-----------|-----------|
| 49 | 2.220089  | 1.412237  | 1.119694  |
| 16 | 2.247093  | -1.143267 | 1.513351  |
| 48 | -0.124040 | -2.059453 | 1.380404  |
| 16 | -2.535200 | -1.294984 | 1.526934  |
| 48 | -2.047817 | 1.176379  | 1.156067  |
| 16 | 0.008069  | 2.688931  | 1.232339  |
| 48 | -0.121075 | 2.059937  | -1.380402 |
| 16 | -2.533233 | 1.298524  | -1.526491 |
| 48 | -2.050358 | -1.173811 | -1.155878 |
| 16 | 0.003820  | -2.688786 | -1.232292 |
| 49 | 2.217672  | -1.415374 | -1.119960 |
| 16 | 2.248674  | 1.140035  | -1.513603 |

\*\*\*\*\*

**For bare Cd<sub>15</sub>S<sub>15</sub> and doped Cd<sub>15</sub>XS<sub>15</sub> clusters:**

### 1. Cd<sub>15</sub>S<sub>15</sub> cluster:

\*\*\*\*\*

|    |           |           |           |
|----|-----------|-----------|-----------|
| 48 | -5.240075 | 2.090767  | 0.599898  |
| 16 | -5.415162 | 0.671360  | 2.696226  |
| 48 | -5.235499 | -1.565518 | 1.511354  |
| 16 | -5.413602 | -2.671238 | -0.765799 |
| 48 | -5.238252 | -0.527797 | -2.112470 |
| 16 | -5.416152 | 1.997842  | -1.930443 |
| 48 | -2.690392 | 1.815232  | -1.752303 |
| 16 | -2.643587 | -0.679427 | -2.721491 |
| 48 | -2.688396 | -2.424153 | -0.694727 |
| 16 | -2.643896 | -2.019218 | 1.949248  |
| 48 | -2.688770 | 0.611315  | 2.446138  |
| 16 | -2.645189 | 2.697253  | 0.773233  |
| 48 | 0.000000  | 2.320503  | 0.664597  |
| 16 | 0.000000  | 0.689465  | 2.754286  |
| 48 | 0.000000  | -1.735560 | 1.677004  |
| 16 | 0.000000  | -2.728251 | -0.780967 |
| 48 | 0.000000  | -0.583530 | -2.338830 |
| 16 | 0.000000  | 2.042327  | -1.970916 |
| 48 | 2.690392  | 1.815232  | -1.752302 |
| 16 | 2.643587  | -0.679427 | -2.721490 |
| 48 | 2.688396  | -2.424152 | -0.694727 |
| 16 | 2.643895  | -2.019218 | 1.949248  |
| 48 | 2.688770  | 0.611315  | 2.446136  |

|    |          |           |           |
|----|----------|-----------|-----------|
| 16 | 2.645189 | 2.697255  | 0.773233  |
| 48 | 5.240076 | 2.090767  | 0.599898  |
| 16 | 5.415162 | 0.671360  | 2.696226  |
| 48 | 5.235499 | -1.565519 | 1.511355  |
| 16 | 5.413602 | -2.671238 | -0.765799 |
| 48 | 5.238253 | -0.527797 | -2.112470 |
| 16 | 5.416152 | 1.997841  | -1.930443 |

\*\*\*\*\*

## 2. Cd<sub>14</sub>CuS<sub>15</sub> cluster:

\*\*\*\*\*

|    |           |           |           |
|----|-----------|-----------|-----------|
| 48 | -5.362145 | 1.842002  | -0.848604 |
| 16 | -5.415837 | 2.247599  | 1.652611  |
| 29 | -5.101246 | 0.000021  | 2.056740  |
| 16 | -5.415837 | -2.247564 | 1.652650  |
| 48 | -5.362150 | -1.842019 | -0.848573 |
| 16 | -5.573331 | -0.000023 | -2.581472 |
| 48 | -2.860764 | -0.000025 | -2.401398 |
| 16 | -2.774435 | -2.449547 | -1.300996 |
| 48 | -2.767079 | -2.236434 | 1.367579  |
| 16 | -2.814061 | 0.000026  | 2.850566  |
| 48 | -2.767077 | 2.236459  | 1.367539  |
| 16 | -2.774434 | 2.449519  | -1.301039 |
| 48 | -0.152101 | 2.101965  | -1.162617 |
| 16 | -0.086197 | 2.451860  | 1.497249  |
| 48 | -0.054905 | 0.000025  | 2.383948  |



|    |           |           |           |
|----|-----------|-----------|-----------|
| 16 | -0.086199 | -2.451825 | 1.497295  |
| 48 | -0.152103 | -2.101983 | -1.162577 |
| 16 | -0.173756 | -0.000025 | -2.784245 |
| 48 | 2.499223  | -0.000024 | -2.531084 |
| 16 | 2.483965  | -2.434683 | -1.387978 |
| 48 | 2.620174  | -2.181436 | 1.255524  |
| 16 | 2.600992  | 0.000026  | 2.790526  |
| 48 | 2.620176  | 2.181458  | 1.255485  |
| 16 | 2.483967  | 2.434657  | -1.388021 |
| 48 | 5.091315  | 1.884494  | -1.166920 |
| 16 | 5.346291  | 2.403383  | 1.303771  |
| 48 | 5.187610  | 0.000017  | 2.102815  |
| 16 | 5.346287  | -2.403363 | 1.303815  |
| 48 | 5.091315  | -1.884516 | -1.166885 |
| 16 | 5.204126  | -0.000027 | -2.865268 |

\*\*\*\*\*

### 3. Cd<sub>13</sub>Cu<sub>2</sub>S<sub>15</sub> cluster:

\*\*\*\*\*

|    |          |           |           |
|----|----------|-----------|-----------|
| 48 | 5.069013 | 1.090818  | 2.074155  |
| 16 | 5.404603 | 2.768319  | 0.214650  |
| 48 | 5.305246 | 1.031615  | -1.653687 |
| 16 | 5.508720 | -1.453126 | -2.125733 |
| 48 | 5.203806 | -2.228242 | 0.265875  |
| 16 | 4.984844 | -1.352496 | 2.625820  |
| 29 | 2.584482 | -1.133879 | 2.023551  |

|    |           |           |           |
|----|-----------|-----------|-----------|
| 16 | 2.631759  | -2.825257 | 0.223067  |
| 48 | 2.763804  | -1.308129 | -1.994762 |
| 16 | 2.750086  | 1.338980  | -2.350768 |
| 48 | 2.708926  | 2.495811  | 0.060676  |
| 16 | 2.401071  | 1.254073  | 2.417466  |
| 29 | 0.050002  | 1.109257  | 1.844835  |
| 16 | 0.085298  | 2.809930  | 0.095721  |
| 48 | 0.095101  | 1.163480  | -2.003091 |
| 16 | 0.076974  | -1.449549 | -2.420403 |
| 48 | 0.042657  | -2.406184 | 0.042757  |
| 16 | 0.176958  | -1.217718 | 2.402088  |
| 48 | -2.547220 | -1.242936 | 2.208753  |
| 16 | -2.575638 | -2.843342 | 0.085122  |
| 48 | -2.612301 | -1.267431 | -2.100583 |
| 16 | -2.543189 | 1.390018  | -2.402311 |
| 48 | -2.560270 | 2.570215  | 0.004769  |
| 16 | -2.343441 | 1.369150  | 2.370946  |
| 48 | -5.004015 | 1.143576  | 1.949274  |
| 16 | -5.259167 | 2.838140  | 0.078273  |
| 48 | -5.126224 | 1.121794  | -1.796563 |
| 16 | -5.342561 | -1.360312 | -2.283960 |
| 48 | -5.160398 | -2.134658 | 0.122088  |
| 16 | -5.265692 | -1.311373 | 2.519594  |

\*\*\*\*\*

#### 4. $\text{Cd}_{11}\text{Cu}_4\text{S}_{15}$ cluster:

\*\*\*\*\*

|    |           |           |           |
|----|-----------|-----------|-----------|
| 48 | 5.380057  | 1.768785  | 0.981320  |
| 16 | 5.261234  | 2.409315  | -1.447483 |
| 29 | 5.468222  | 0.187920  | -1.797525 |
| 16 | 5.453132  | -2.068210 | -1.755340 |
| 48 | 5.512533  | -1.876691 | 0.757804  |
| 16 | 5.555974  | -0.148251 | 2.597903  |
| 29 | 3.159197  | -0.220520 | 2.321907  |
| 16 | 2.899063  | -2.444019 | 1.261129  |
| 48 | 2.878004  | -1.949787 | -1.427275 |
| 16 | 2.015498  | 0.130134  | -2.887026 |
| 48 | 2.673186  | 2.105720  | -1.205257 |
| 16 | 2.711391  | 2.207516  | 1.514792  |
| 48 | 0.062827  | 1.984828  | 1.340262  |
| 16 | 0.028645  | 2.518166  | -1.277981 |
| 29 | -0.174665 | 0.263997  | -2.247910 |
| 16 | 0.217840  | -2.137865 | -1.528499 |
| 48 | 0.279068  | -1.966055 | 1.145939  |
| 16 | 0.940818  | -0.035538 | 2.864404  |
| 29 | -2.467786 | -0.107360 | 1.689892  |
| 16 | -2.303833 | -2.334926 | 1.361177  |
| 48 | -2.540184 | -2.043685 | -1.267928 |
| 16 | -2.514465 | 0.190291  | -2.671352 |
| 48 | -2.702605 | 2.224798  | -0.991152 |
| 16 | -2.508282 | 2.150202  | 1.662076  |

|    |           |           |           |
|----|-----------|-----------|-----------|
| 48 | -5.277303 | 1.555931  | 1.411610  |
| 16 | -5.364074 | 2.382929  | -1.020376 |
| 48 | -5.151279 | 0.036670  | -1.954913 |
| 16 | -5.169847 | -2.425484 | -1.340575 |
| 48 | -5.131455 | -1.937860 | 1.180526  |
| 16 | -6.019393 | -0.327035 | 2.815310  |

\*\*\*\*\*

### 5. Cd<sub>14</sub>GaS<sub>15</sub> cluster:

\*\*\*\*\*

|    |          |           |           |
|----|----------|-----------|-----------|
| 48 | 5.365639 | 0.981140  | -1.816057 |
| 16 | 5.466288 | -1.543156 | -2.099489 |
| 31 | 5.186914 | -2.639410 | 0.006283  |
| 16 | 5.466234 | -1.533156 | 2.106793  |
| 48 | 5.365638 | 0.989747  | 1.811405  |
| 16 | 5.530411 | 2.749651  | -0.006506 |
| 48 | 2.824057 | 2.485364  | -0.005864 |
| 16 | 2.772117 | 1.316948  | 2.418246  |
| 48 | 2.765850 | -1.322571 | 2.142412  |
| 16 | 2.745671 | -2.930240 | 0.007037  |
| 48 | 2.765954 | -1.333128 | -2.136460 |
| 16 | 2.772077 | 1.305280  | -2.424238 |
| 48 | 0.127446 | 1.166377  | -2.086570 |
| 16 | 0.082396 | -1.476171 | -2.421802 |
| 48 | 0.028612 | -2.485287 | 0.005971  |
| 16 | 0.082353 | -1.464250 | 2.428715  |

|    |           |           |           |
|----|-----------|-----------|-----------|
| 48 | 0.127414  | 1.176819  | 2.081394  |
| 16 | 0.148336  | 2.815850  | -0.006800 |
| 48 | -2.539924 | 2.543030  | -0.006114 |
| 16 | -2.510432 | 1.404167  | 2.420264  |
| 48 | -2.619082 | -1.248550 | 2.171488  |
| 16 | -2.620846 | -2.816807 | 0.006872  |
| 48 | -2.619122 | -1.259439 | -2.165749 |
| 16 | -2.510366 | 1.392178  | -2.426770 |
| 48 | -5.116048 | 1.151541  | -1.886310 |
| 16 | -5.348166 | -1.322258 | -2.399635 |
| 48 | -5.202607 | -2.115361 | 0.005120  |
| 16 | -5.348178 | -1.310348 | 2.405884  |
| 48 | -5.116110 | 1.160921  | 1.880750  |
| 16 | -5.250695 | 2.854357  | -0.006995 |

\*\*\*\*\*

### 6. $\text{Cd}_{13}\text{Ga}_2\text{S}_{15}$ cluster:

\*\*\*\*\*

|    |          |           |           |
|----|----------|-----------|-----------|
| 48 | 5.651592 | 2.870842  | -0.177983 |
| 16 | 5.436562 | 1.247241  | -2.360485 |
| 48 | 5.416259 | -1.157297 | -1.645484 |
| 16 | 5.583000 | -2.610539 | 0.441650  |
| 48 | 5.358474 | -0.677968 | 2.058176  |
| 16 | 4.979596 | 1.822140  | 2.373107  |
| 31 | 2.739640 | 1.418967  | 1.864717  |
| 16 | 2.706306 | -0.909039 | 2.389225  |



|    |           |           |           |
|----|-----------|-----------|-----------|
| 48 | 2.849793  | -2.534442 | 0.258786  |
| 16 | 2.789804  | -1.709674 | -2.238966 |
| 48 | 2.860866  | 1.003164  | -2.161108 |
| 16 | 2.490659  | 2.750771  | -0.082960 |
| 31 | 0.170554  | 2.250670  | -0.016925 |
| 16 | 0.182064  | 1.115717  | -2.090471 |
| 48 | 0.177221  | -1.570020 | -1.833870 |
| 16 | 0.140926  | -2.936183 | 0.456567  |
| 48 | 0.026405  | -0.993698 | 2.233415  |
| 16 | 0.410779  | 1.664601  | 2.278329  |
| 48 | -3.045236 | 1.625221  | 1.819076  |
| 16 | -2.573232 | -0.889771 | 2.444733  |
| 48 | -2.555825 | -2.499042 | 0.264662  |
| 16 | -2.407519 | -1.568270 | -2.218147 |
| 48 | -2.586338 | 1.138269  | -2.026963 |
| 16 | -2.015029 | 2.982582  | -0.110620 |
| 48 | -6.265868 | 2.407002  | -0.401682 |
| 16 | -5.161725 | 1.125519  | -2.478947 |
| 48 | -5.058550 | -1.302114 | -1.817421 |
| 16 | -5.225618 | -2.852081 | 0.212941  |
| 48 | -5.281646 | -0.939223 | 1.872688  |
| 16 | -5.616516 | 1.544984  | 2.077073  |

\*\*\*\*\*

### 7. Cd<sub>11</sub>Ga<sub>4</sub>S<sub>15</sub> cluster:

\*\*\*\*\*

|    |           |           |           |
|----|-----------|-----------|-----------|
| 48 | -5.444208 | 0.380062  | 1.944120  |
| 16 | -5.509940 | -2.159846 | 1.677690  |
| 31 | -6.155860 | -2.443007 | -0.564667 |
| 16 | -5.451665 | -1.105842 | -2.230643 |
| 48 | -5.708196 | 1.875029  | -1.843264 |
| 16 | -5.264693 | 2.647838  | 0.858407  |
| 31 | -2.999279 | 2.102185  | 0.623707  |
| 16 | -2.870938 | 1.643225  | -1.686944 |
| 48 | -2.834244 | -0.982697 | -2.021113 |
| 16 | -2.042232 | -3.113220 | -0.678618 |
| 48 | -2.748059 | -1.995122 | 1.532976  |
| 16 | -2.824633 | 0.471791  | 2.398504  |
| 48 | -0.069160 | 0.953910  | 2.205777  |
| 16 | 0.063025  | -1.665561 | 1.860374  |
| 31 | 0.080180  | -2.176051 | -0.475896 |
| 16 | -0.055871 | -0.598583 | -2.250564 |
| 48 | -0.184164 | 1.928672  | -1.377027 |
| 16 | -0.904429 | 3.062499  | 0.910919  |
| 31 | 2.991519  | 2.906667  | 0.713320  |
| 16 | 2.442812  | 2.152504  | -1.506045 |
| 48 | 2.616707  | -0.663548 | -2.214756 |
| 16 | 2.267576  | -2.838237 | -0.705854 |
| 48 | 2.739303  | -1.650003 | 1.628200  |
| 16 | 2.563391  | 1.161540  | 2.317231  |
| 48 | 5.253395  | 0.687990  | 2.015144  |

|    |          |           |           |
|----|----------|-----------|-----------|
| 16 | 5.298825 | -1.790791 | 1.951255  |
| 48 | 5.724348 | -2.424833 | -0.712304 |
| 16 | 5.147524 | -0.604371 | -2.721997 |
| 48 | 5.142245 | 1.617062  | -1.617761 |
| 16 | 5.464013 | 2.802259  | 0.611909  |

\*\*\*\*\*

### 8. Cd<sub>14</sub>HgS<sub>15</sub> cluster:

\*\*\*\*\*

|    |           |           |           |
|----|-----------|-----------|-----------|
| 48 | -5.012505 | 1.326863  | 1.909935  |
| 16 | -5.287491 | -1.147466 | 2.480322  |
| 80 | -5.319511 | -1.843074 | 0.010528  |
| 16 | -5.287613 | -1.176225 | -2.467224 |
| 48 | -5.012449 | 1.304449  | -1.924734 |
| 16 | -5.149543 | 2.977055  | -0.017077 |
| 48 | -2.428044 | 2.652002  | -0.015058 |
| 16 | -2.419425 | 1.509087  | -2.436824 |
| 48 | -2.533638 | -1.143096 | -2.137280 |
| 16 | -2.533969 | -2.665465 | 0.015285  |
| 48 | -2.533472 | -1.117800 | 2.149470  |
| 16 | -2.419448 | 1.537302  | 2.419981  |
| 48 | 0.230049  | 1.269778  | 2.078196  |
| 16 | 0.153430  | -1.339441 | 2.470860  |
| 48 | 0.103927  | -2.386157 | 0.013502  |
| 16 | 0.153411  | -1.367932 | -2.455943 |
| 48 | 0.230050  | 1.245127  | -2.091628 |

|    |          |           |           |
|----|----------|-----------|-----------|
| 16 | 0.262347 | 2.894649  | -0.016614 |
| 48 | 2.957594 | 2.507185  | -0.014250 |
| 16 | 2.878046 | 1.373836  | -2.429288 |
| 48 | 2.834239 | -1.293946 | -2.167673 |
| 16 | 2.741037 | -2.834582 | 0.016202  |
| 48 | 2.834077 | -1.268345 | 2.181591  |
| 16 | 2.878104 | 1.401993  | 2.413913  |
| 48 | 5.459701 | 0.998469  | 1.874279  |
| 16 | 5.553110 | -1.479502 | 2.411794  |
| 48 | 5.353774 | -2.283385 | 0.013069  |
| 16 | 5.553267 | -1.507383 | -2.394879 |
| 48 | 5.459705 | 0.976579  | -1.885345 |
| 16 | 5.693264 | 2.676277  | -0.015368 |

\*\*\*\*\*

### 9. Cd<sub>13</sub>Hg<sub>2</sub>S<sub>15</sub> cluster:

\*\*\*\*\*

|    |          |           |           |
|----|----------|-----------|-----------|
| 48 | 5.258127 | -1.571251 | 1.188935  |
| 16 | 5.330098 | 0.360509  | 2.836425  |
| 48 | 5.098106 | 2.176114  | 1.084617  |
| 16 | 5.257511 | 2.650913  | -1.405991 |
| 48 | 5.188366 | 0.223217  | -2.147277 |
| 16 | 5.548021 | -2.129822 | -1.274053 |
| 80 | 2.726761 | -2.076999 | -1.190676 |
| 16 | 2.595042 | 0.110431  | -2.837918 |
| 48 | 2.558562 | 2.313435  | -1.297293 |

|    |           |           |           |
|----|-----------|-----------|-----------|
| 16 | 2.479252  | 2.606047  | 1.365027  |
| 48 | 2.600631  | 0.222216  | 2.557314  |
| 16 | 2.696910  | -2.249087 | 1.540394  |
| 80 | -0.060672 | -1.961717 | 1.271074  |
| 16 | -0.118691 | 0.182032  | 2.903286  |
| 48 | -0.142805 | 2.205532  | 1.173226  |
| 16 | -0.118122 | 2.498687  | -1.469397 |
| 48 | -0.061039 | 0.023236  | -2.420431 |
| 16 | -0.068476 | -2.418566 | -1.380324 |
| 48 | -2.784727 | -2.120354 | -1.218852 |
| 16 | -2.710646 | -0.002861 | -2.836178 |
| 48 | -2.795026 | 2.215975  | -1.343510 |
| 16 | -2.781317 | 2.522682  | 1.318544  |
| 48 | -2.837693 | 0.130187  | 2.496926  |
| 16 | -2.808975 | -2.309859 | 1.436717  |
| 48 | -5.391766 | -1.772902 | 1.069799  |
| 16 | -5.580409 | 0.151522  | 2.717573  |
| 48 | -5.376962 | 1.979438  | 0.975936  |
| 16 | -5.506671 | 2.443899  | -1.517151 |
| 48 | -5.322561 | 0.019763  | -2.252816 |
| 16 | -5.517611 | -2.356770 | -1.398663 |

\*\*\*\*\*

**10. Cd<sub>11</sub>Hg<sub>4</sub>S<sub>15</sub> cluster:**

\*\*\*\*\*

|    |           |          |          |
|----|-----------|----------|----------|
| 48 | -5.034307 | 1.230259 | 1.939084 |
|----|-----------|----------|----------|

|    |           |           |           |
|----|-----------|-----------|-----------|
| 16 | -5.330214 | -1.247988 | 2.478356  |
| 80 | -5.392277 | -1.896405 | 0.000037  |
| 16 | -5.330219 | -1.248084 | -2.478308 |
| 48 | -5.034306 | 1.230182  | -1.939127 |
| 16 | -5.263212 | 2.869743  | -0.000054 |
| 80 | -2.492772 | 2.640574  | -0.000051 |
| 16 | -2.452582 | 1.435367  | -2.505205 |
| 48 | -2.562871 | -1.206908 | -2.161679 |
| 16 | -2.607251 | -2.719295 | 0.000050  |
| 48 | -2.562868 | -1.206818 | 2.161717  |
| 16 | -2.452582 | 1.435468  | 2.505152  |
| 48 | 0.212356  | 1.154197  | 2.104570  |
| 16 | 0.135376  | -1.440592 | 2.538248  |
| 80 | 0.075591  | -2.526224 | 0.000045  |
| 16 | 0.135377  | -1.440689 | -2.538200 |
| 48 | 0.212357  | 1.154111  | -2.104606 |
| 16 | 0.241289  | 2.759068  | -0.000053 |
| 80 | 3.003665  | 2.473349  | -0.000047 |
| 16 | 2.880605  | 1.298618  | -2.486323 |
| 48 | 2.823998  | -1.367613 | -2.187274 |
| 16 | 2.767925  | -2.900634 | 0.000054  |
| 48 | 2.823994  | -1.367521 | 2.187319  |
| 16 | 2.880604  | 1.298719  | 2.486275  |
| 48 | 5.457862  | 0.884835  | 1.898489  |
| 16 | 5.550985  | -1.596109 | 2.412482  |

|    |          |           |           |
|----|----------|-----------|-----------|
| 48 | 5.381503 | -2.359086 | 0.000047  |
| 16 | 5.550991 | -1.596203 | -2.412418 |
| 48 | 5.457862 | 0.884760  | -1.898516 |
| 16 | 5.795134 | 2.544946  | -0.000047 |

\*\*\*\*\*

### 11. Cd<sub>14</sub>InS<sub>15</sub> cluster:

\*\*\*\*\*

|    |           |           |           |
|----|-----------|-----------|-----------|
| 48 | 5.224397  | 1.179247  | -1.829726 |
| 16 | 5.397726  | -1.315678 | -2.237624 |
| 49 | 5.303490  | -2.561261 | 0.000287  |
| 16 | 5.397728  | -1.315163 | 2.237908  |
| 48 | 5.224404  | 1.179673  | 1.829467  |
| 16 | 5.362556  | 2.927281  | -0.000332 |
| 48 | 2.648832  | 2.615904  | -0.000290 |
| 16 | 2.623315  | 1.457181  | 2.416597  |
| 48 | 2.699153  | -1.190609 | 2.142186  |
| 16 | 2.693866  | -2.793297 | 0.000323  |
| 48 | 2.699153  | -1.191128 | -2.141945 |
| 16 | 2.623309  | 1.456611  | -2.416902 |
| 48 | -0.014756 | 1.231549  | -2.079013 |
| 16 | 0.018330  | -1.405774 | -2.426571 |
| 48 | -0.001393 | -2.436937 | 0.000273  |
| 16 | 0.018329  | -1.405197 | 2.426869  |
| 48 | -0.014754 | 1.232057  | 2.078765  |
| 16 | -0.043389 | 2.879924  | -0.000331 |

|    |           |           |           |
|----|-----------|-----------|-----------|
| 48 | -2.721599 | 2.525593  | -0.000285 |
| 16 | -2.659170 | 1.383089  | 2.423018  |
| 48 | -2.683672 | -1.272584 | 2.167938  |
| 16 | -2.639626 | -2.837317 | 0.000327  |
| 48 | -2.683678 | -1.273115 | -2.167675 |
| 16 | -2.659166 | 1.382511  | -2.423313 |
| 48 | -5.253362 | 1.058604  | -1.882800 |
| 16 | -5.409670 | -1.419977 | -2.403075 |
| 48 | -5.240479 | -2.211620 | 0.000255  |
| 16 | -5.409667 | -1.419407 | 2.403394  |
| 48 | -5.253366 | 1.059055  | 1.882567  |
| 16 | -5.443052 | 2.752007  | -0.000319 |

\*\*\*\*\*

## 12. Cd<sub>13</sub>In<sub>2</sub>S<sub>15</sub> cluster:

\*\*\*\*\*

|    |          |           |           |
|----|----------|-----------|-----------|
| 48 | 4.247741 | -2.424842 | -0.201653 |
| 16 | 4.948604 | -1.589894 | 2.203293  |
| 48 | 4.408454 | 0.891036  | 2.102111  |
| 16 | 4.994193 | 2.543437  | 0.121479  |
| 48 | 4.354906 | 1.241730  | -1.930854 |
| 16 | 4.762554 | -1.317544 | -2.386381 |
| 49 | 2.544390 | -1.137769 | -3.685198 |
| 16 | 2.526397 | 1.428073  | -3.738049 |
| 48 | 2.728258 | 3.473222  | 0.912141  |
| 16 | 2.595234 | 2.319719  | 3.240843  |



|    |           |           |           |
|----|-----------|-----------|-----------|
| 48 | 2.619475  | -2.487974 | 2.683470  |
| 16 | 2.297595  | -4.008055 | 0.526135  |
| 49 | 0.341701  | -2.558119 | 0.106694  |
| 16 | 0.370427  | -1.326596 | 2.367982  |
| 48 | 0.374673  | 1.371634  | 2.296316  |
| 16 | 0.406435  | 2.974885  | -0.022685 |
| 48 | 0.440071  | 1.513980  | -2.199769 |
| 16 | 0.535667  | -1.284455 | -2.026210 |
| 48 | -2.396156 | -1.199162 | -1.985987 |
| 16 | -2.168782 | 1.415387  | -2.367599 |
| 48 | -2.300057 | 2.572807  | 0.017557  |
| 16 | -2.236246 | 1.361867  | 2.374849  |
| 48 | -2.548948 | -1.249369 | 2.019793  |
| 16 | -2.074913 | -2.904302 | 0.018912  |
| 48 | -5.659672 | -2.399559 | -0.066506 |
| 16 | -5.149572 | -1.244363 | 2.299732  |
| 48 | -4.956034 | 1.218567  | 1.847373  |
| 16 | -4.962792 | 2.942580  | -0.024768 |
| 48 | -4.874646 | 1.226326  | -1.909950 |
| 16 | -4.997650 | -1.237272 | -2.380496 |

\*\*\*\*\*

### 13. Cd<sub>11</sub>In<sub>4</sub>S<sub>15</sub> cluster:

\*\*\*\*\*

|    |          |           |           |
|----|----------|-----------|-----------|
| 48 | 5.707379 | 1.771422  | -1.960669 |
| 16 | 5.319902 | -1.095990 | -2.250484 |

|    |           |           |           |
|----|-----------|-----------|-----------|
| 49 | 5.296342  | -2.762937 | -0.426748 |
| 16 | 5.342348  | -1.951423 | 2.020064  |
| 48 | 5.336868  | 0.575040  | 1.934256  |
| 16 | 5.305327  | 2.760372  | 0.685724  |
| 49 | 2.849918  | 2.389453  | 0.489576  |
| 16 | 2.679497  | 0.845861  | 2.528331  |
| 48 | 2.670145  | -1.721398 | 1.953627  |
| 16 | 2.401627  | -2.915041 | -0.395239 |
| 48 | 2.770385  | -0.797460 | -2.154741 |
| 16 | 2.714401  | 1.844481  | -1.953564 |
| 48 | 0.054071  | 1.858277  | -1.632331 |
| 16 | 0.056943  | -0.768814 | -2.354611 |
| 49 | -0.015683 | -2.283680 | -0.352251 |
| 16 | -0.073587 | -1.633321 | 2.091129  |
| 48 | -0.035574 | 1.049539  | 2.214479  |
| 16 | 0.481861  | 3.121990  | 0.679720  |
| 49 | -3.065829 | 2.959900  | 0.528990  |
| 16 | -2.678967 | 1.136956  | 2.304915  |
| 48 | -2.795879 | -1.615642 | 1.765186  |
| 16 | -2.372386 | -2.903333 | -0.538854 |
| 48 | -2.670490 | -0.836901 | -2.224917 |
| 16 | -2.576499 | 1.941066  | -1.785145 |
| 48 | -5.292357 | 1.343982  | -1.738879 |
| 16 | -5.210933 | -0.940207 | -2.706220 |
| 48 | -5.639127 | -2.669060 | -0.588413 |

16 -5.359859 -1.834511 2.037044

48 -5.386854 0.645197 1.932408

16 -5.696166 2.655798 0.403497

\*\*\*\*\*
